# Supplementary material for: Plant Regeneration and In Vitro Growth Performance of Male-Sterile Somatic Plantlets of Sugi (Japanese Cedar, Cryptomeria japonica) Derived from Different Embryogenic Cell Lines
Source: MDPI journal article supplement (doi:10.3390/f12111592), 2021-11-18
Supplement: s1 [file s1]

## Supplementary materials

**Table S1.** Analysis of deviance table of maturation efficiency by cell lines of sugi (Japanese cedar, *C. japonica*). Residual deviance was estimated by generalized linear models using the cell line as the explanatory variable.

| Model       | D.f. | Deviance | Residual d.f. | Residual deviance | AIC     | Deviance explained |
|-------------|------|----------|---------------|-------------------|---------|--------------------|
| Null        |      |          | 94            | 16925.9           | 17579.6 |                    |
| + Cell line | 18   | 10702    | 76            | 6224.1            | 6913.8  | 63.2%              |

**Table S2.** Analysis of deviance table of germination rate by cell lines of sugi (Japanese cedar, *C. japonica*). The number of germinants per number of installed cotyledonary embryos was applied to the GLMs with a binomial distribution.

| Model       | D.f. | Deviance | Residual d.f. | Residual deviance | AIC    | Deviance explained |
|-------------|------|----------|---------------|-------------------|--------|--------------------|
| Null        |      |          | 132           | 822.6             | 1150.0 |                    |
| + Cell line | 18   | 385.0    | 114           | 437.6             | 801.0  | 46.8%              |

**Table S3.** Analysis of deviance table of efficiency from germination to plantlet conversion of sugi (Japanese cedar, *C. japonica*). The number of converted plantlets per number of germinants was applied to the GLMs with a binomial distribution.

| Model.      | D.f. | Deviance | Residual d.f. | Residual deviance | AIC   | Deviance explained |
|-------------|------|----------|---------------|-------------------|-------|--------------------|
| Null        |      |          | 132           | 198.1             | 361.6 |                    |
| + Cell line | 18   | 37.0     | 114           | 161.2             | 360.7 | 18.7%              |

**Table S4.** Analysis of deviance table for somatic plantlet growth of sugi (Japanese cedar, *C. japonica*) in height (HG), diameter (DG), developed number of first-order branches (DNB), developed number of roots (DNR), maximum length of first-order branches (MLB), and maximum length of roots (MLR).

| Trait | Model       | D.f. | Deviance | Residual d.f. | Residual deviance | AIC    | Deviance explained |
|-------|-------------|------|----------|---------------|-------------------|--------|--------------------|
| HG    | Null        |      |          | 170           | 400.0             | 634.6  |                    |
|       | + Cell line | 18   | 133.0    | 152           | 267.0             | 601.5  | 33.2%              |
| DG    | Null        |      |          | 170           | 7.2               | -53.4  |                    |
|       | + Cell line | 18   | 2.4      | 152           | 4.8               | -87.2  | 33.5%              |
| DNB   | Null        |      |          | 170           | 175.1             | 660.4  |                    |
|       | + Cell line | 18   | 33.6     | 152           | 141.5             | 662.8  | 19.2%              |
| DNR   | Null        |      |          | 170           | 81.4              | 662.6  |                    |
|       | + Cell line | 18   | 20.7     | 152           | 60.8              | 677.9  | 25.4%              |
| MLB   | Null        |      |          | 164           | 420.8             | 626.7  |                    |
|       | + Cell line | 18   | 105.1    | 146           | 315.8             | 615.3  | 25.0%              |
| MLR   | Null        |      |          | 170           | 7116.3            | 1126.8 |                    |
|       | + Cell line | 18   | 2826     | 152           | 4290.3            | 1076.3 | 39.7%              |

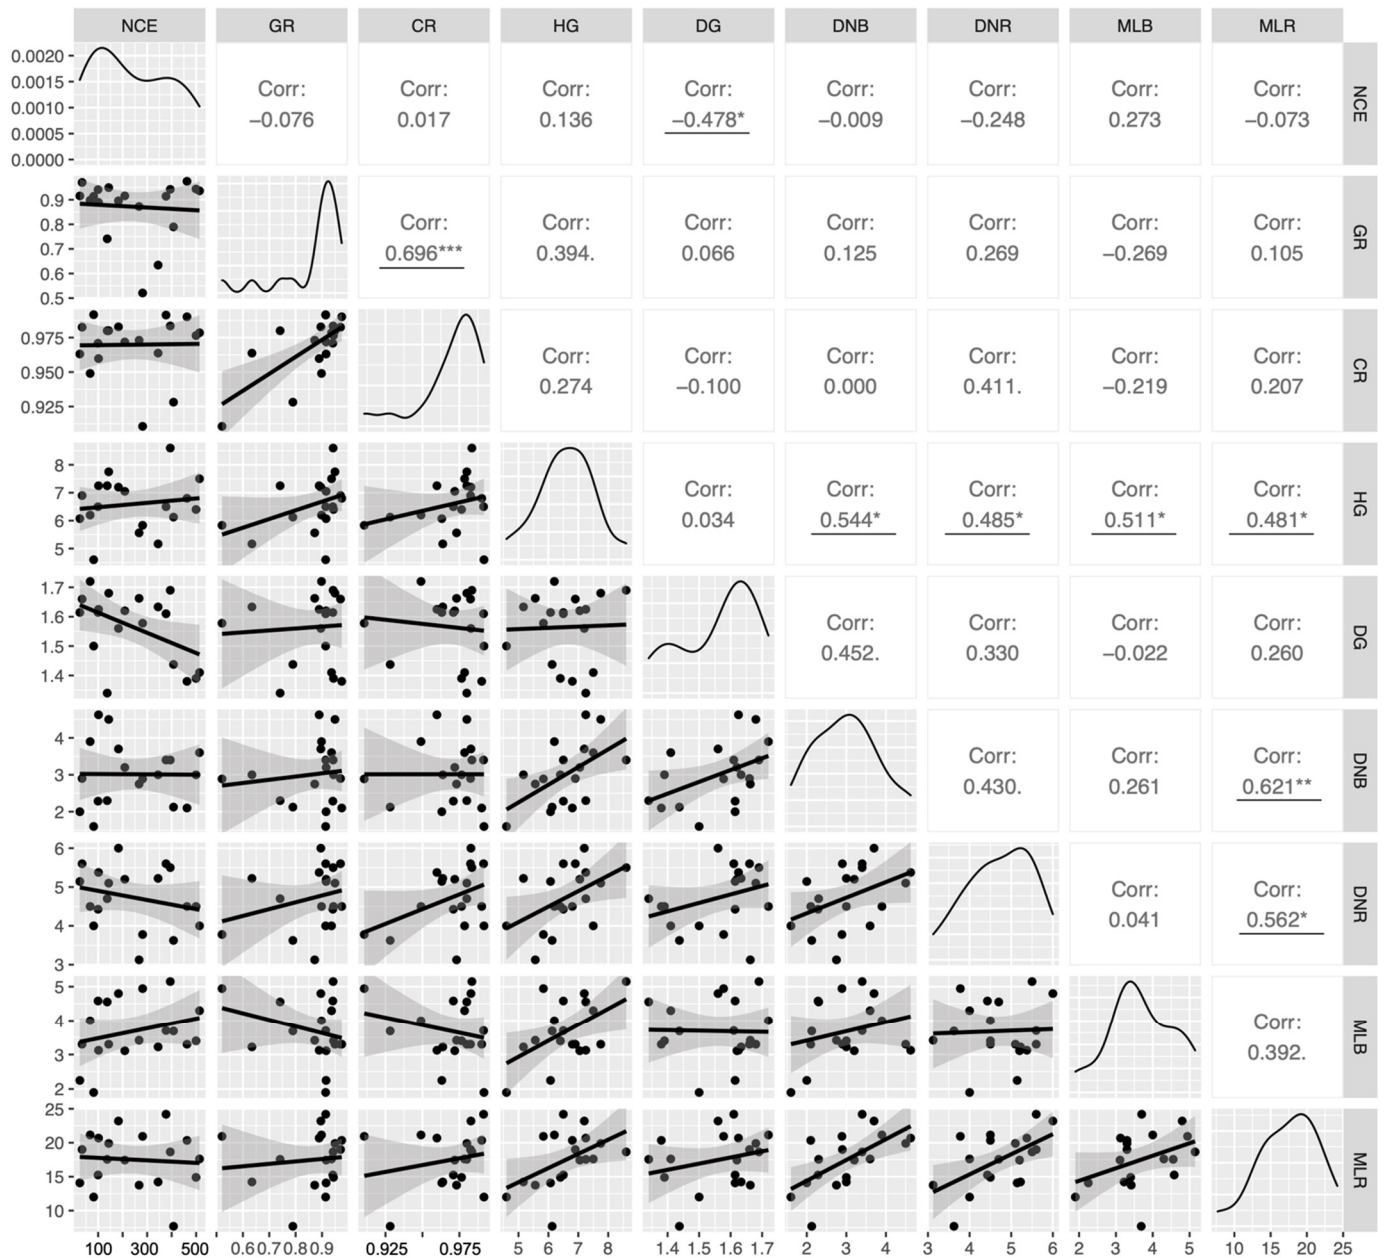

**Figure S1.** Pairwise correlations among mean value of the number of matured cotyledonary embryos, average rates of germination and plantlet conversion, and growth traits of 19 somatic sugi lines. NCE: number of matured cotyledonary embryos, GR: germination rate, CR: plantlet conversion rate, HG: height growth, DG: diameter growth, DNB: developed number of first-order branches, DNR: developed number of roots, MLB: maximum length of first-order branches, and MLR: maximum length of roots. Spearman's coefficient values and their significances are presented in the upper right.
